# Supplementary material
Source: PubMed Central journal article supplement (PMC6299452)
Supplement: NIHMS1000380-supplement-SI.pdf [file NIHMS1000380-supplement-SI.pdf]

## Supporting information

# CaZnOS:Nd<sup>3+</sup> emits tissue-penetrating near-infrared light upon force loading

Lejing Li,<sup>†</sup> Lothar Wondraczek,<sup>‡</sup> Lihua Li,<sup>†,§</sup> Yu Zhang,<sup>§</sup> Ye Zhu,<sup>§</sup> Mingying Peng<sup>\*,†</sup> and Chuanbin Mao<sup>\*,§,§</sup>

<sup>†</sup> The China-Germany Research Center for Photonic Materials and Devices; The State Key Laboratory of Luminescent Materials and Devices, Guangdong Provincial Key Laboratory of Fiber Laser Materials and Applied Techniques, School of Materials Science and Technology, South China University of Technology, Guangzhou 510640, P. R. China

<sup>‡</sup> Otto Schott Institute of Materials Research, University of Jena, Jena 07743, Germany

<sup>§</sup> Guangdong Key Lab of Orthopedic Technology and Implant, Department of Orthopedics, Guangzhou General Hospital of Guangzhou Military Command, Guangzhou 510010, P. R. China

<sup>§</sup> Department of Chemistry and Biochemistry, Stephenson Life Sciences Research center, University of Oklahoma, Norman, Oklahoma 73019, United States

<sup>§</sup> School of Materials Science and Engineering, Zhejiang University, Hangzhou, Zhejiang, 310027, China

Corresponding Authors:

\* Email: pengmingying@scut.edu.cn. (M.Y.P.)

\* Email: cbmao@ou.edu. (C.B.M.)

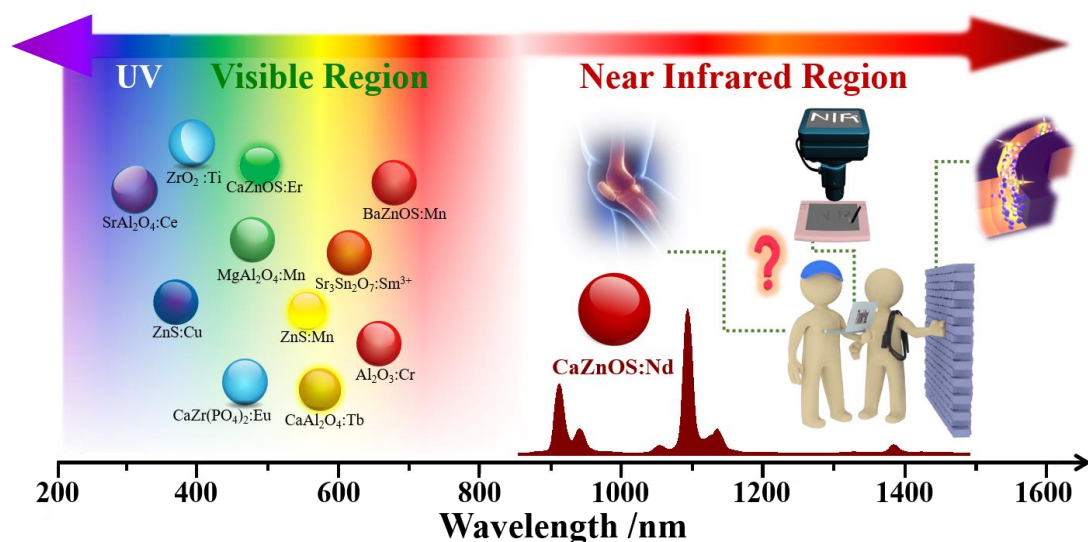

**Figure S1.** Overview of existing ML materials with luminescence within near ultraviolet to visible region. However, for biological imaging, such as imaging biomechanical changes of tissues and encryption of digital signature, and health monitoring, NIR ML materials are needed but remain unexplored. In the upper right corner, a pencil is schematically placed on a sheet made of NIR ML material and the glowing trace is recorded by a NIR camera above the sheet to highlight what letters are written on the sheet.

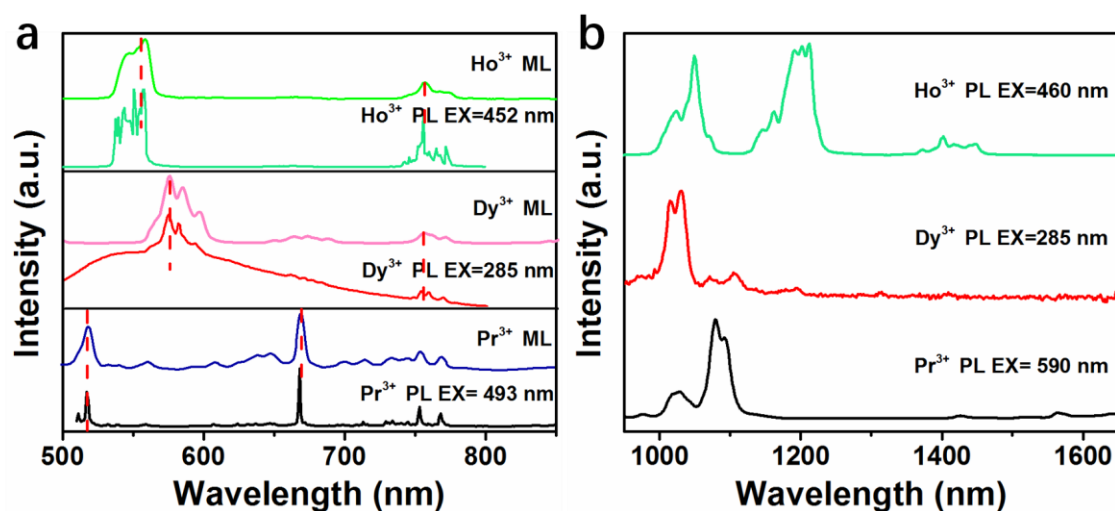

**Figure S2.** (a) The photoluminescence (PL) and ML of CaZnOS:RE<sup>3+</sup> (RE<sup>3+</sup>=Ho<sup>3+</sup>, Pr<sup>3+</sup>, Dy<sup>3+</sup>), which is in accordance with in the range of 450 ~ 900 nm. (b) The NIR ML emissions of CaZnOS:RE<sup>3+</sup> (RE<sup>3+</sup>=Ho<sup>3+</sup>, Pr<sup>3+</sup>, Dy<sup>3+</sup>) are not observed even if NIR emissions can be activated by a short wavelength light.

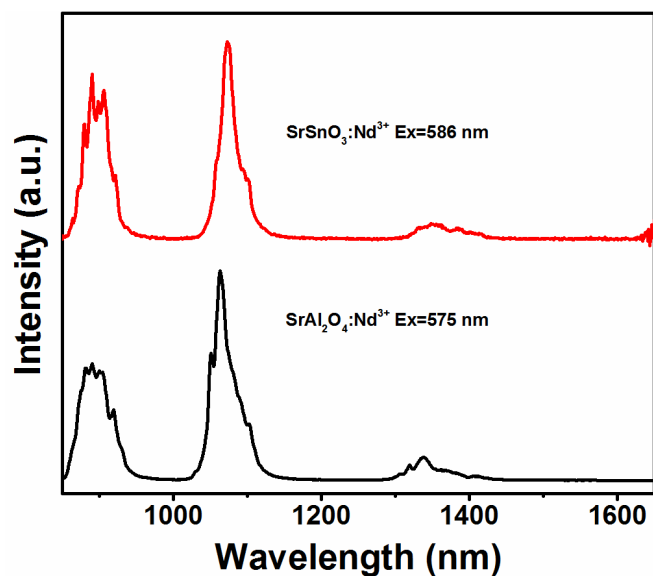

**Figure S3.** The NIR PL spectra of  $\text{SrAl}_2\text{O}_4:\text{Nd}^{3+}$  and  $\text{SrSnO}_3:\text{Nd}^{3+}$ .

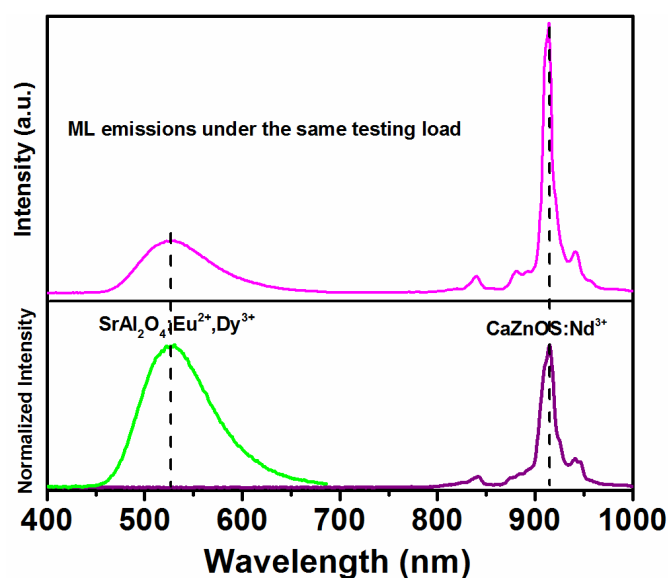

**Figure S4. Top:** ML intensity of a mixture consisting of as-prepared  $\text{CaZnOS}:\text{Nd}^{3+}$  and the currently reported most efficient visible ML phosphor  $\text{SrAl}_2\text{O}_4:\text{Eu}^{2+}, \text{Dy}^{3+}$  under a load of 3000 N. The NIR ML intensity is five times greater than that visible ML from  $\text{SrAl}_2\text{O}_4:\text{Eu}^{2+}, \text{Dy}^{3+}$ . **Bottom:** The normalized ML intensity of as-prepared  $\text{CaZnOS}:\text{Nd}^{3+}$  alone (purple curve) and the currently reported most efficient visible ML phosphor  $\text{SrAl}_2\text{O}_4:\text{Eu}^{2+}, \text{Dy}^{3+}$  alone (green curve).

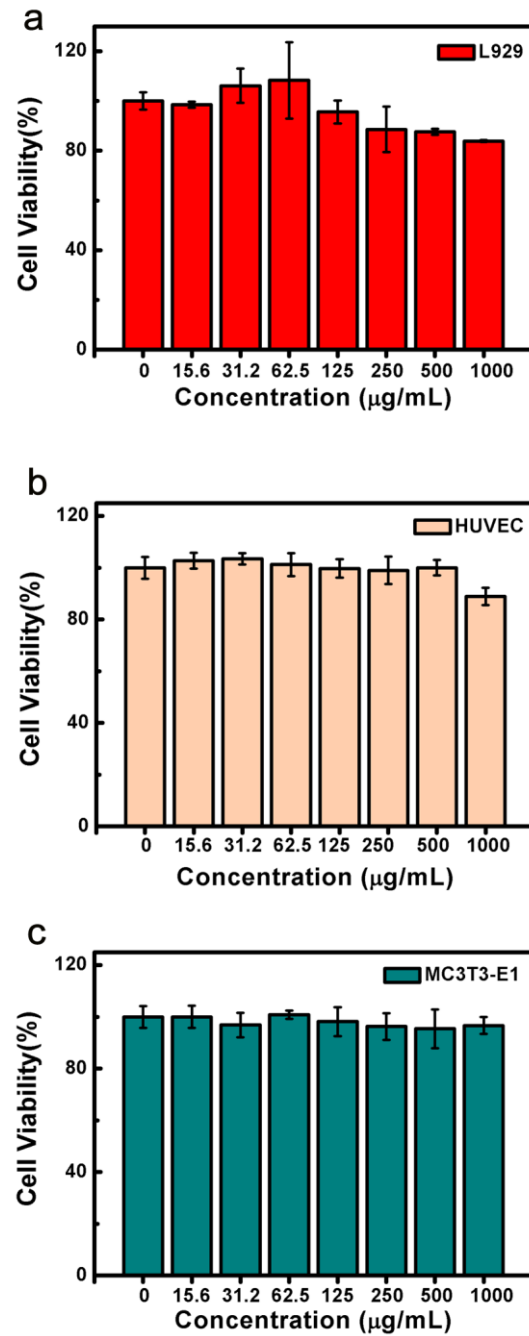

**Figure S5.** The *In vitro* cytotoxicity of different concentrations of CaZnOS:1.0%Nd<sup>3+</sup> particles on (a) L929, (b) HUVEC and (c) MC3T3-E1 cells after co-cultured for 24 h at 37 °C incubation.
